# Supplementary material
Source: PubMed Central journal article supplement (PMC8390892)

**Biophysical Journal, Volume 120**

**Supplemental information**

**Multivalent binding of the partially disordered SARS-CoV-2 nucleocapsid phosphoprotein dimer to RNA**

**Heather M. Forsythe, Joaquin Rodriguez Galvan, Zhen Yu, Seth Pinckney, Patrick Reardon, Richard B. Cooley, Phillip Zhu, Amber D. Rolland, James S. Prell, and Elisar Barbar**

**Figure S1.**

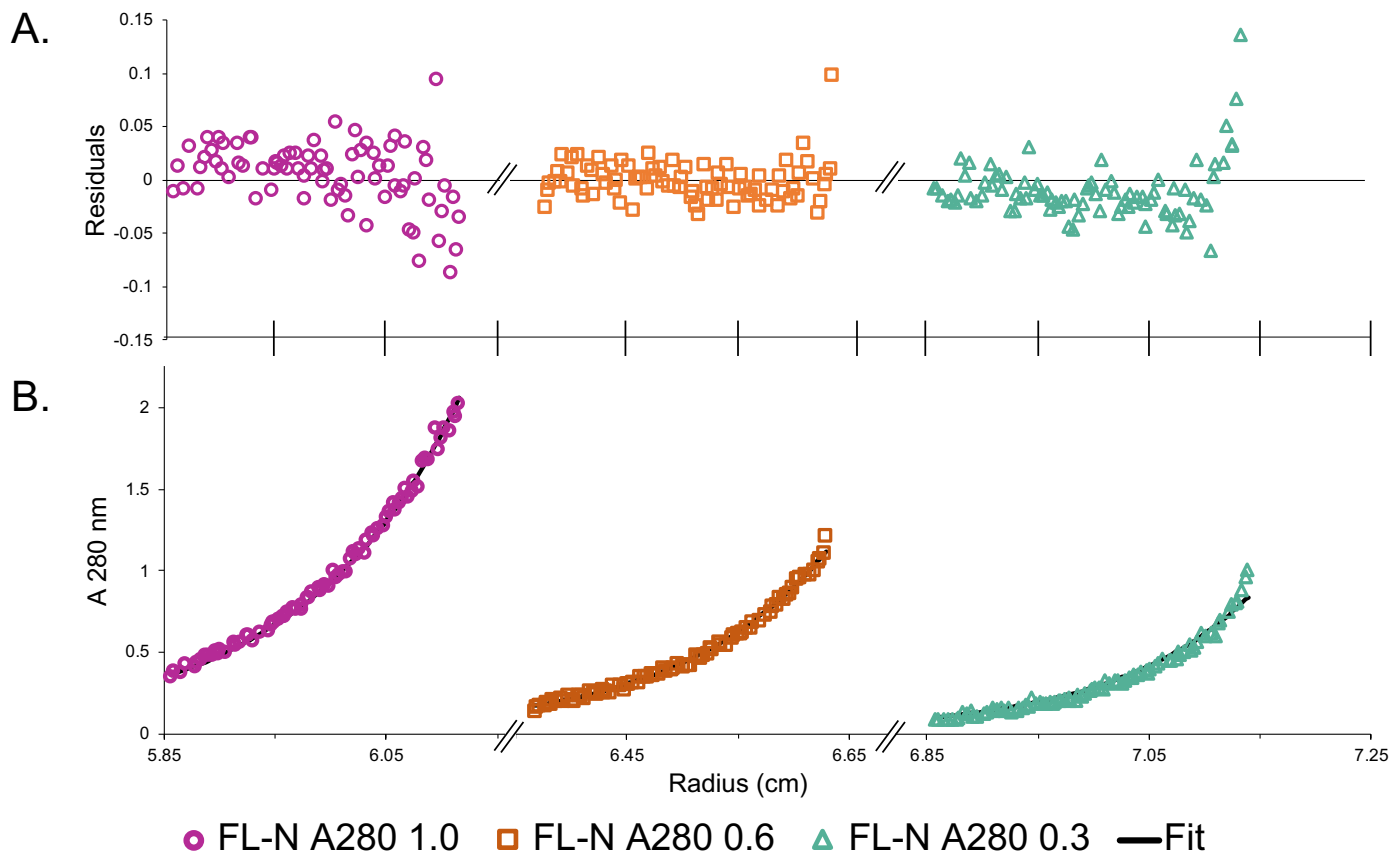

**Figure S2.**

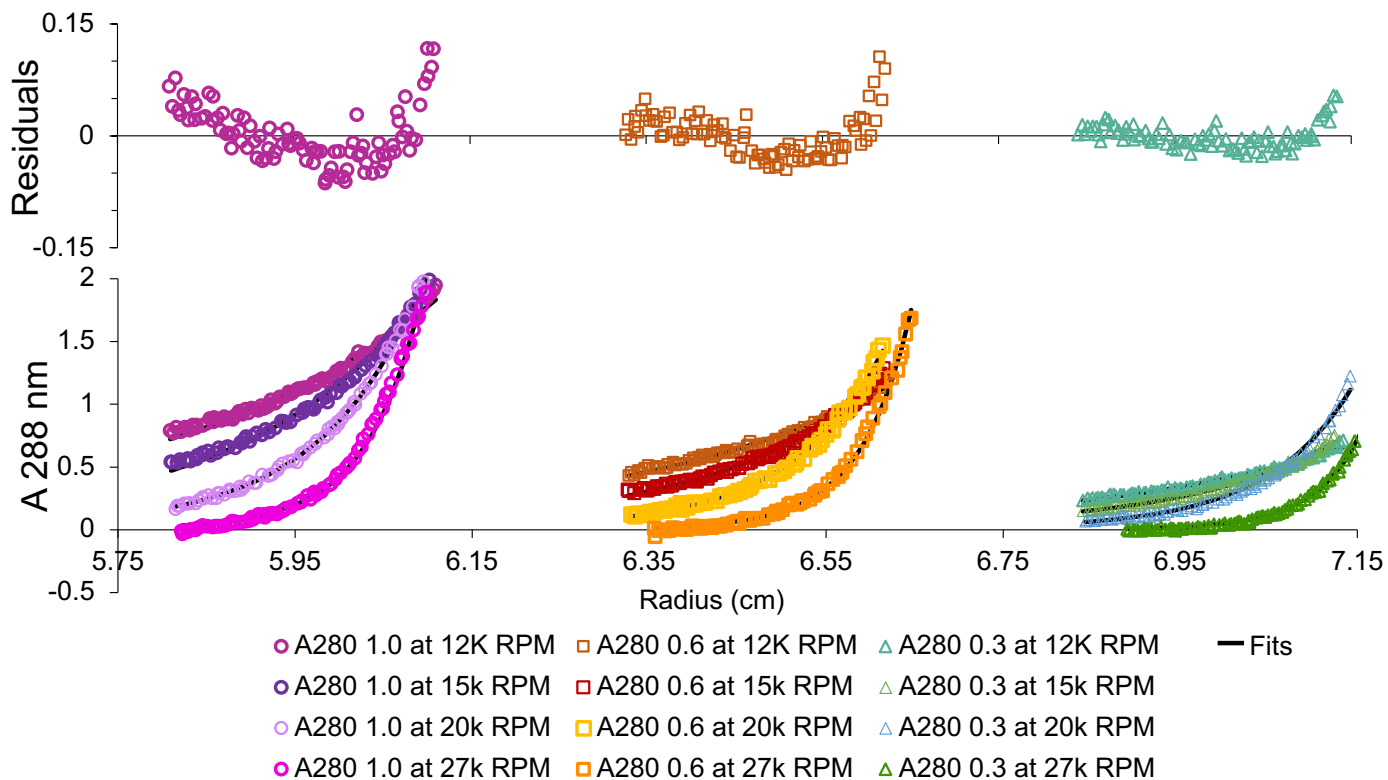

Supplement: mmc1.pdf [file mmc1.pdf]
